# Supplementary material
Source: ML conference proceedings conference paper supplement (https://openreview.net/forum?id=oi45JlpSOT)
Supplement: supplementary_material [file attachment]

## 449 Supplementary Materials

### 450 A Simulation Details of Figure 1

451 In Figure 1, we report the cost complexities of Algorithm 1 with EXPLORE-A and Algorithm 1  
 452 with EXPLORE-B (let  $\tilde{\mu}_1^{(M)} = 0.95$  and  $\tilde{\mu}_2^{(M)} = 0.75$ ). We set the confidence parameter  $\delta$  as  
 453 0.05, 0.1, 0.15, 0.2, 0.25 respectively in comparing the performance of both procedures. For each  
 454 simulation, we run 100 trials, plot their cost complexities' mean as markers and their deviation as  
 455 shaded regions. We present the parameters of MF-MAB instances of Figures 1a and 1b in Tables 2  
 456 and 3 respectively. We note that it is more difficult to find the optimal fidelity  $m_k^*$  in the MF-MAB  
 457 instances for Figure 1b because (1) there are more fidelities choices in this instance than that of  
 458 Figure 1a; (2) the value of  $\tilde{\Delta}_k^{(m)}/\sqrt{\lambda^{(m)}}$  are closer in the second instance than that of Figure 1a.

Table 2: Figure 1a's MF-MAB with  $K = 5$  arms and  $M = 3$  fidelities

| Parameters | $\mu_1^{(m)}$ | $\mu_2^{(m)}$ | $\mu_3^{(m)}$ | $\mu_4^{(m)}$ | $\mu_5^{(m)}$ | $\zeta^{(m)}$ | $\lambda^{(m)}$ |
|------------|---------------|---------------|---------------|---------------|---------------|---------------|-----------------|
| $m = 1$    | 0.70          | 0.75          | 0.50          | 0.50          | 0.30          | 0.30          | 1               |
| $m = 2$    | 0.80          | 0.775         | 0.60          | 0.55          | 0.45          | 0.15          | 1.1             |
| $m = 3$    | 0.90          | 0.80          | 0.70          | 0.60          | 0.50          | 0             | 1.2             |

Table 3: Figure 1b's MF-MAB with  $K = 5$  arms and  $M = 5$  fidelities

| Parameters | $\mu_1^{(m)}$ | $\mu_2^{(m)}$ | $\mu_3^{(m)}$ | $\mu_4^{(m)}$ | $\mu_5^{(m)}$ | $\zeta^{(m)}$ | $\lambda^{(m)}$ |
|------------|---------------|---------------|---------------|---------------|---------------|---------------|-----------------|
| $m = 1$    | 0.83          | 0.82          | 0.76          | 0.82          | 0.70          | 0.10          | 1               |
| $m = 2$    | 0.84          | 0.83          | 0.80          | 0.80          | 0.72          | 0.08          | 1.1             |
| $m = 3$    | 0.85          | 0.85          | 0.80          | 0.82          | 0.74          | 0.06          | 1.2             |
| $m = 4$    | 0.85          | 0.86          | 0.80          | 0.80          | 0.76          | 0.04          | 1.3             |
| $m = 5$    | 0.90          | 0.88          | 0.86          | 0.84          | 0.80          | 0             | 1.4             |

### 459 B A Third Fidelity Selection Procedure: EXPLORE-C

460 Besides the EXPLORE-A and -B procedures, here we consider a third naïve and conservative idea for  
 461 fidelity selection that one should start from low risk (cost), gradually increase the risk (cost) as the  
 462 learning task needs, and stop when finding the optimal arm. To decide when to increase the fidelity  
 463 for exploring an arm  $k$ , we use the arm's confidence radius  $\beta(N_{k,t}^{(m)}, t, \delta)$  at fidelity  $m$  as a measure  
 464 of the amount of information left in this fidelity, and when the fidelity  $m$ 's confidence radius is less  
 465 than the error upper bound  $\zeta^{(m)}$  at this fidelity, we increase the fidelity by 1 for higher accuracy, or  
 466 formally, the fidelity is selected as follows,

$$m_{k,t} \leftarrow \min \left\{ m \mid \beta(N_{k,t}^{(m)}, t, \delta) \geq \zeta^{(m)} \right\}.$$

---

#### Algorithm 3 EXPLORE-C Procedures

---

**procedure** EXPLORE-C( $k$ )

$$m_{k,t} \leftarrow \min \left\{ m \mid \beta(N_{k,t}^{(m)}, t, \delta) \geq \zeta^{(m)} \right\}$$

Pull  $(k, m_{k,t})$ , observe reward, and update corresponding statistics

---

467 **Theorem B.1** (Cost complexity upper bounds for Algorithm 1 with EXPLORE-C). *Given Assump-*  
 468 *tion 3.3 and  $L \geq 4KM$ , Algorithm 1 outputs the optimal arm with a probability at least  $1 - \delta$ . The*  
 469 *cost complexity of Algorithm 1 with EXPLORE-C are upper bounded as follows,*

$$\mathbb{E}[\Lambda] = O \left( H^\dagger \log \left( \frac{L(H^\dagger + Q)}{\lambda^{(1)}\delta} \right) + Q \log \left( \frac{L(H^\dagger + Q)}{\lambda^{(1)}\delta} \right) \right), \quad (10)$$

470 where, letting  $m_k^\dagger$  denote the smallest fidelity for arm  $k$  such that  $\Delta_k^{(m)} > 2\zeta^{(m)}$ , or formally,

$$m_k^\dagger := \min\{m : \Delta_k^{(m)} > 2\zeta^{(m)}\},$$

471 and we denote

$$H^\dagger := \sum_{k \in \mathcal{K}} \frac{\lambda^{(m_k^\dagger)}}{(\Delta_k^{(m_k^\dagger)})^2}, \quad Q := \sum_{k \in \mathcal{K}} \sum_{m=1}^{m_k^\dagger-1} \frac{\lambda^{(m)}}{(\zeta^{(m)})^2}.$$

472 **Remark B.2** (EXPLORE-C vs. EXPLORE-A and -B). The EXPLORE-C procedure does not require  
 473 additional knowledge as the other two. It is a one-size-fits-all option. If with some addition  
 474 information of a specific scenario, e.g., the exact or approximated reward means of top two arms, one  
 475 can use the EXPLORE-A or B.

## 476 C Proofs for Best Arm Identification with Fixed Confidence

### 477 C.1 Proof of Theorem 3.1

478 **Lemma C.1** (Kaufmann et al. [21], Lemma 1). Let  $\nu$  and  $\nu'$  be two bandit models with  $K$  arms such  
 479 that for all  $k$ , the distributions  $\nu_k$  and  $\nu'_k$  are mutually absolutely continuous. For any almost-surely  
 480 finite stopping time  $\sigma$  with respect to the filtration  $\{\mathcal{F}_t\}_{t \in \mathbb{N}}$  where  $\mathcal{F}_t = \sigma(I_1, X_1, \dots, I_t, X_t)$ ,

$$\sum_{k=1}^K \mathbb{E}_\nu[N_k(\sigma)] \text{KL}(\nu_k, \nu'_k) \geq \sup_{\mathcal{E} \in \mathcal{F}_\sigma} \text{kl}(\mathbb{P}_\nu(\mathcal{E}), \mathbb{P}_{\nu'}(\mathcal{E})),$$

481 where  $\text{kl}(x, y)$  is the binary relative entropy.

482 In MF-MAB model, regarding each arm-fidelity  $(k, m)$ -pair as an individual arm, we can extend  
 483 Lemma C.1 to multi-fidelity case as follows,

$$\sum_{k=1}^K \sum_{m=1}^M \mathbb{E}_\nu[N_k^{(m)}(\sigma)] \text{KL}(\nu_k^{(m)}, \nu'_k^{(m)}) \geq \sup_{\mathcal{E} \in \mathcal{F}_\sigma} \text{kl}(\mathbb{P}_\nu(\mathcal{E}), \mathbb{P}_{\nu'}(\mathcal{E})). \quad (11)$$

484 Next, we construct instances  $\nu$  and  $\nu'$ . We set the reward distributions  $\nu = (\nu_k^{(m)})_{(k,m) \in \mathcal{K} \times \mathcal{M}}$   
 485 as Bernoulli and the reward means fulfill  $\mu_1^{(M)} > \mu_2^{(M)} \geq \mu_3^{(M)} \geq \dots \geq \mu_K^{(M)}$ , where  $\mu_k^{(m)} =$   
 486  $\mathbb{E}_{X \sim \nu_k^{(m)}}[X]$ . We let  $\nu'_k^{(m)}$  be the same to  $\nu_k^{(m)}$  for all  $k$  and  $m$ , except for that an arm  $\ell \neq 1$ . We set  
 487 arm  $\ell$ 's reward means on fidelities  $m \in \mathcal{M}_k$  to be  $\nu'_\ell^{(m)} = \nu_1^{(M)} - \zeta^{(m)} + \epsilon$ . So, in instance  $\nu'$ , the  
 488 optimal arm is  $\ell$  and its true reward mean  $\mu'_\ell^{(M)}$  is slightly greater than  $\mu_1^{(M)}$ . This implies for the  
 489 event  $\mathcal{E} = \{\text{output arm 1}\}$  and any algorithm  $\pi$  that can find the optimal arm with a confidence  $1 - \delta$ ,  
 490  $\mathbb{P}_{\nu, \pi}(\mathcal{E}) \geq 1 - \delta$  and  $\mathbb{P}_{\nu', \pi}(\mathcal{E}) \leq \delta$ . Then, from Eq.(11), we have

$$\begin{aligned} \sum_{m \in \mathcal{M}_k} \mathbb{E}_\nu[N_\ell^{(m)}(\sigma)] \text{KL}(\nu_\ell^{(m)}, \nu'_\ell^{(m)}) &\geq \sup_{\mathcal{E} \in \mathcal{F}_\sigma} \text{kl}(\mathbb{P}_{\nu, \pi}(\mathcal{E}), \mathbb{P}_{\nu', \pi}(\mathcal{E})) \\ &\geq \text{kl}(1 - \delta, \delta) \\ &\geq \log \frac{1}{2.4\delta}. \end{aligned}$$

491 We rewrite the above inequality as follows,

$$\sum_{m \in \mathcal{M}_k} \lambda^{(m)} \mathbb{E}_\nu[N_\ell^{(m)}(\sigma)] \cdot \frac{\text{KL}(\nu_\ell^{(m)}, \nu'_\ell^{(m)})}{\lambda^{(m)}} \geq \log \frac{1}{2.4\delta}.$$

492 Therefore, for the arm  $\ell$ , our aim is to minimize its cost complexity with a constraint as follows,

$$\begin{aligned} &\min_{\mathbb{E}[N_\ell^{(m)}], \forall m} \sum_{m=1}^M \lambda^{(m)} \mathbb{E}_\nu[N_\ell^{(m)}(\sigma)] \\ \text{such that } &\sum_{m \in \mathcal{M}_k} \lambda^{(m)} \mathbb{E}_\nu[N_\ell^{(m)}(\sigma)] \cdot \frac{\text{KL}(\nu_\ell^{(m)}, \nu'_\ell^{(m)})}{\lambda^{(m)}} \geq \log \frac{1}{2.4\delta}. \end{aligned}$$

493 Note that the above is a linear programming (LP) and its optimum is reached at one of its polyhedron  
 494 constraint's vertex—only one  $\mathbb{E}[N_\ell^{(m)}]$  is positive and all others are equal to zero.

$$\begin{aligned} \min_{\mathbb{E}[N_\ell^{(m)}], \forall m} \sum_{m=1}^M \lambda^{(m)} \mathbb{E}_\nu[N_\ell^{(m)}(\sigma)] &\stackrel{(a)}{\geq} \min_{m \in \mathcal{M}_k} \frac{\lambda^{(m)}}{\text{KL}(\nu_\ell^{(m)}, \nu_\ell^{(m)})} \log \frac{1}{2.4\delta} \\ &= \min_{m \in \mathcal{M}_k} \frac{\lambda^{(m)}}{\text{KL}(\nu_\ell^{(m)}, \nu_1^{(M)} - \zeta^{(m)} + \epsilon)} \log \frac{1}{2.4\delta} \\ &\stackrel{(b)}{\geq} \min_{m \in \mathcal{M}_k} \frac{\lambda^{(m)}}{(1 + \epsilon) \text{KL}(\nu_\ell^{(m)}, \nu_1^{(M)} - \zeta^{(m)})} \log \frac{1}{2.4\delta} \end{aligned}$$

495 where the inequality (a) is due to the property of LP we mentioned above, and the inequality (b) is  
 496 because of the continuity of KL-divergence.

497 To bound the optimal arm 1's cost complexity, we use the same  $\nu$  as above and construct another  
 498 instance  $\nu''$ . The instance  $\nu''$ 's reward means are the same to  $\nu$  except for arm 1 whose reward means  
 499 for fidelity  $m \in \mathcal{M}_1$  are set as  $\mu_1^{(m)} = \mu_2^{(m)} + \zeta^{(m)} - \epsilon$ . Then, with similar procedure as the above,  
 500 we obtain

$$\min_{\mathbb{E}[N_1^{(m)}], \forall m} \sum_{m=1}^M \lambda^{(m)} \mathbb{E}_\nu[N_1^{(m)}(\sigma)] \geq \min_{m \in \mathcal{M}_1} \frac{\lambda^{(m)}}{(1 + \epsilon) \text{KL}(\nu_1^{(m)}, \nu_2^{(M)} + \zeta^{(m)})} \log \frac{1}{2.4\delta}.$$

501 Summing up the above costs leads to the lower bound as follows, and letting the  $\epsilon$  goes to zeros  
 502 concludes the proof.

$$\mathbb{E}[\Lambda] \geq \left( \min_{m \in \mathcal{M}_1} \frac{\lambda^{(m)}}{(1 + \epsilon) \text{KL}(\nu_1^{(m)}, \nu_2^{(M)} + \zeta^{(m)})} + \sum_{k \neq 1} \min_{m \in \mathcal{M}_k} \frac{\lambda^{(m)}}{(1 + \epsilon) \text{KL}(\nu_k^{(m)}, \nu_1^{(M)} - \zeta^{(m)})} \right) \log \frac{1}{2.4\delta}.$$

## 503 C.2 Proof of Theorem 3.4

504 **Notation.** Denote the threshold  $c = \frac{\mu_1^{(M)} + \mu_2^{(M)}}{2}$  as the average of the optimal and best suboptimal  
 505 arms' reward means. Denote  $\mathcal{A}_t := \{k \in \mathcal{K} : \text{LCB}_{k,t} > c\}$  and  $\mathcal{B}_t := \{k \in \mathcal{K} : \text{UCB}_{k,t} < c\}$  as the  
 506 above and below sets which respectively contain arms whose rewards are clearly higher or lower  
 507 than the threshold with high probability, and let  $\mathcal{C}_t := \mathcal{K} \setminus (\mathcal{A}_t \cup \mathcal{B}_t)$  as the complement of both sets'  
 508 union. Then, we define two events as follows

$$\begin{aligned} \text{TERM}_t &:= \{\text{LCB}_{\ell_t,t} > \text{UCB}_{u_t,t}\}, \\ \text{CROS}_t &:= \{\exists k \neq 1 : k \in \mathcal{A}_t\} \cup \{1 \in \mathcal{B}_t\}. \end{aligned}$$

509 The  $\text{TERM}_t$  event corresponds to the complement of the main while loop condition in the LUCB  
 510 algorithm. When the  $\text{TERM}_t$  event happens, the LUCB algorithm terminates. The  $\text{CROS}_t$  event means  
 511 there exists a suboptimal arm whose  $\text{LCB}_{k,t}$  is greater than  $c$  or that the optimal arm 1's  $\text{UCB}_{1,t}$  is  
 512 less than  $c$ , both of which means that at least one arm's reward mean confidence interval incorrectly  
 513 crosses the threshold  $c$ .

514 **Step 1. Prove  $\neg \text{TERM}_t \cap \neg \text{CROS}_t \implies (\ell_t \in \mathcal{C}_t) \cup (u_t \in \mathcal{C}_t)$ .** We show this statement by contradiction  
 515 case by case. That is, the negation of  $(\ell_t \in \mathcal{C}_t) \cup (u_t \in \mathcal{C}_t)$  cannot happen when  $\neg \text{TERM}_t \cap \neg \text{CROS}_t$ .

**Case 1:**  $(\ell_t \in \mathcal{A}_t) \cap (u_t \in \mathcal{A}_t) \cap \neg \text{TERM}_t$

$$\implies (\ell_t \in \mathcal{A}_t) \cap (u_t \in \mathcal{A}_t) \implies |\mathcal{A}_t| \geq 2 \implies \exists k \neq 1 : k \in \mathcal{A}_t \implies \text{CROS}_t,$$

**Case 2:**  $(\ell_t \in \mathcal{B}_t) \cap (u_t \in \mathcal{A}_t) \cap \neg \text{TERM}_t$

$$\implies \text{UCB}_{\ell_t,t} < c < \text{LCB}_{u_t,t} < \text{UCB}_{u_t,t} \implies \emptyset \text{ (contradicts the selection of } \ell_t \text{ and } u_t),$$

**Case 3:**  $(\ell_t \in \mathcal{A}_t) \cap (u_t \in \mathcal{B}_t) \cap \neg \text{TERM}_t$

$$\implies \{\text{LCB}_{\ell_t,t} > c > \text{UCB}_{u_t,t}\} \cap \neg \text{TERM}_t \implies \emptyset,$$

**Case 4:**  $(\ell_t \in \mathcal{B}_t) \cap (u_t \in \mathcal{B}_t) \cap \neg \text{TERM}_t$

$$\implies (\ell_t \in \mathcal{B}_t) \cap (u_t \in \mathcal{B}_t) \implies |\mathcal{B}_t| = K \implies 1 \in \mathcal{B}_t \implies \text{CROS}_t.$$

516 **Step 2. Prove**  $\mathbb{P}(\text{CROS}_t) \leq \frac{KM\delta}{Lt^3}$ . For any suboptimal arm  $k \neq 1$ , we bound the probability that  
 517 the arm  $k$  is in  $\mathcal{A}_t$  as follows,

$$\begin{aligned}
 \mathbb{P}(k \in \mathcal{A}_t) &= \mathbb{P}(\text{LCB}_{k,t} > c) = \mathbb{P}\left(\max_{m \in \mathcal{M}} \text{LCB}_{k,t}^{(m)} > c\right) \leq \sum_{m \in \mathcal{M}} \mathbb{P}\left(\text{LCB}_{k,t}^{(m)} > c\right) \\
 &= \sum_{m \in \mathcal{M}} \mathbb{P}\left(\hat{\mu}_{k,t}^{(m)} - \zeta^{(m)} - \beta(N_{k,t}^{(m)}, t) > c\right) \\
 &= \sum_{m \in \mathcal{M}} \mathbb{P}\left(\hat{\mu}_{k,t}^{(m)} - \mu_k^{(m)} + (\mu_k^{(m)} - \zeta^{(m)} - c) > \beta(N_{k,t}^{(m)}, t)\right) \\
 &\stackrel{(a)}{\leq} \sum_{m \in \mathcal{M}} \mathbb{P}\left(\hat{\mu}_{k,t}^{(m)} - \mu_k^{(m)} > \beta(N_{k,t}^{(m)}, t)\right) \leq \sum_{m \in \mathcal{M}} \sum_{n=1}^t \mathbb{P}(\hat{\mu}_{k,t}^{(m)} - \mu_k^{(m)} > \beta(n, t)) \\
 &\leq \sum_{m \in \mathcal{M}} \sum_{n=1}^t \exp(-n(\beta(n, t))^2) = \sum_{m \in \mathcal{M}} \sum_{n=1}^t \frac{\delta}{Lt^4} \\
 &\leq \frac{M\delta}{Lt^3},
 \end{aligned}$$

518 where the inequality (a) is due to that  $\mu_k^{(m)} - \zeta^{(m)} \leq \mu_k^{(M)} < c$ . With similar derivation, we  
 519 have  $\mathbb{P}(1 \in \mathcal{B}_t) \leq \frac{M\delta}{Lt^3}$ . Noticing that  $\mathbb{P}(\text{CROS}_t) \leq \sum_{k \neq 1} \mathbb{P}(k \in \mathcal{A}_t) + \mathbb{P}(1 \in \mathcal{B}_t)$ , we have  
 520  $\mathbb{P}(\text{CROS}_t) \leq \frac{KM\delta}{Lt^3}$ .

521 **Step 3. Prove**  $\mathbb{P}\left(\exists k \in \mathcal{K} : (N_{k,t}^{(m_k^*)} > 16N_{k,t}^*) \cap (k \in \text{Mid}_t)\right) \leq \frac{16\delta \sum_{k \in \mathcal{K}} \Delta_k^{-2}}{Lt^4}$ , where  $N_{k,t}^* :=$   
 522  $\frac{\log(Lt^4/\delta)}{(\Delta_k^{(\tilde{m}_k^*)})^2}$ . For any fixed suboptimal arm  $k \neq 1$  (with  $\mu_k^{(M)} < c$ ), we have

$$\begin{aligned}
 &\mathbb{P}\left((N_{k,t}^{(m_k^*)} > 16N_{k,t}^*) \cap (k \in \text{Mid}_t)\right) \\
 &= \mathbb{P}\left((N_{k,t}^{(m_k^*)} > 16N_{k,t}^*) \cap (k \notin \mathcal{A}_t \cup \mathcal{B}_t)\right) \\
 &\leq \mathbb{P}\left((N_{k,t}^{(m_k^*)} > 16N_{k,t}^*) \cap (\text{UCB}_{k,t} > c)\right) \\
 &= \mathbb{P}\left((N_{k,t}^{(m_k^*)} > 16N_{k,t}^*) \cap \left(\min_{m \in \mathcal{M}} \hat{\mu}_{k,t}^{(m)} + \zeta^{(m)} + \beta(N_{k,t}^{(m)}, t) > c\right)\right) \\
 &\leq \mathbb{P}\left((N_{k,t}^{(m_k^*)} > 16N_{k,t}^*) \cap (\hat{\mu}_{k,t}^{(m_k^*)} + \zeta^{(m_k^*)} + \beta(N_{k,t}^{(m_k^*)}, t) > c)\right) \\
 &\leq \mathbb{P}\left((N_{k,t}^{(m_k^*)} > 16N_{k,t}^*) \cap (\hat{\mu}_{k,t}^{(m_k^*)} - \mu_k^{(m_k^*)} > (c - \mu_k^{(m_k^*)} - \zeta^{(m_k^*)}) - \beta(N_{k,t}^{(m_k^*)}, t))\right) \\
 &\stackrel{(a)}{\leq} \mathbb{P}\left((N_{k,t}^{(m_k^*)} > 16N_{k,t}^*) \cap \left(\hat{\mu}_{k,t}^{(m_k^*)} - \mu_k^{(m_k^*)} > \frac{\Delta_k^{(\tilde{m}_k^*)}}{2} - \beta(N_{k,t}^{(\tilde{m}_k^*)}, t)\right)\right) \\
 &\stackrel{(b)}{\leq} \sum_{\tau > 16N_{k,t}^*} \mathbb{P}\left(\hat{\mu}_{k,t(\tau)}^{(m_k^*)} - \mu_k^{(m_k^*)} > \frac{\Delta_k^{(\tilde{m}_k^*)}}{4}\right) \quad \left(\text{denote } \hat{\mu}_{k,t(\tau)}^{(m_k^*)} \text{ as the empirical mean of } \tau \text{ observations}\right) \\
 &\leq \sum_{\tau > 16N_{k,t}^*} \exp\left(-\frac{\tau(\Delta_k^{(\tilde{m}_k^*)})^2}{16}\right) \leq \int_{\tau > 16N_{k,t}^*} \exp\left(-\frac{\tau(\Delta_k^{(\tilde{m}_k^*)})^2}{16}\right) d\tau \leq \frac{16\delta}{(\Delta_k^{(\tilde{m}_k^*)})^2 Lt^4},
 \end{aligned}$$

523 where inequality (a) is due to Eq.(6) and inequality (b) is due to  $\beta(\tau, t) < \frac{\Delta_k}{4}$  for  $\tau > 16N_{k,t}^*$ .

524 From Step 3, we obtain that the following equation holds with high probability,

$$N_{k,t}^{(\tilde{m}_k^*)} \leq \frac{16}{(\Delta_k^{(\tilde{m}_k^*)})^2} \log\left(\frac{Lt^4}{\delta}\right) \leq \frac{64}{(\Delta_k^{(\tilde{m}_k^*)})^2} \log\left(\frac{Lt}{\delta}\right). \quad (12)$$

525 Next, we respectively present the cost complexity upper bounds for different fidelity selection  
 526 procedures in Algorithm 2.

## 527 C.2.1 Proof for EXPLORE-A's Upper Bound

528 **Step 4 for EXPLORE-A:** prove that if the small probability events of Steps 2 and 3 do not  
 529 happen, then the algorithm terminates with a high probability when  $\Lambda$  is large.

530 **Lemma C.2.** Give reward means  $\mu_1^{(M)}$  and  $\mu_2^{(M)}$ . For a fixed arm  $k$ , there exist  $\bar{N}_{k,t}$  and  $\alpha_k > 0$   
 531 such that when  $N_{k,t} > \bar{N}_{k,t}$ ,  $N_{k,t} < 2N_{k,t}^{(\tilde{m}_k^*)}$ , the number of times of pulling this arm  $k$  at fidelities  
 532  $m (\neq \tilde{m}_k^*)$  is  $O(\log(\log N_{k,t}))$ , or formally,

$$N_{k,t}^{(m)} \leq \frac{8}{\lambda^{(m)}} \left( \frac{\Delta_k^{(\tilde{m}_k^*)}}{\sqrt{\lambda^{(\tilde{m}_k^*)}}} - \frac{\Delta_k^{(m)}}{\sqrt{\lambda^{(m)}}} \right)^{-2} \log N_{k,t}, \forall m \neq \tilde{m}_k^*. \quad (13)$$

533 Combine Lemma C.2 with Eq.(12) in Step 3, we have, for any arm  $k$  and fidelity  $m \neq \tilde{m}_k^*$ :

$$N_{k,t}^{(m)} \leq \frac{8}{\lambda^{(m)}} \left( \frac{\Delta_k^{(\tilde{m}_k^*)}}{\sqrt{\lambda^{(\tilde{m}_k^*)}}} - \frac{\Delta_k^{(m)}}{\sqrt{\lambda^{(m)}}} \right)^{-2} \log \left( \frac{128}{(\Delta_k^{(\tilde{m}_k^*)})^2} \log \left( \frac{Lt}{\delta} \right) \right) \quad (14)$$

534 Next, we can upper bound the total cost of the LUCB algorithm (before it terminating) via Eq.(12)  
 535 and Eq.(14). Specially, we show it is impossible for  $\Lambda = C \left( H \log \frac{L(G+H)}{\lambda^{(1)}\delta} + G \log \log \frac{L(G+H)}{\lambda^{(1)}\delta} \right)$   
 536 via contradiction. Suppose  $\Lambda = C \left( H \log \frac{L(G+H)}{\lambda^{(1)}\delta} + G \log \log \frac{L(G+H)}{\lambda^{(1)}\delta} \right)$ , we have the following,

$$\begin{aligned} \mathbb{E}[\Lambda] &\leq \sum_{k \in \mathcal{K}} \sum_{m \in \mathcal{M}} \lambda^{(m)} N_{k,t}^{(m)} \\ &\leq \sum_{k \in \mathcal{K}} \lambda^{(\tilde{m}_k^*)} N_{k,t}^{(\tilde{m}_k^*)} + \sum_{k \in \mathcal{K}} \sum_{m \neq \tilde{m}_k^*} \lambda^{(m)} N_{k,t}^{(m)} \\ &\stackrel{(a)}{\leq} 64H \log \frac{Lt}{\delta} + 8G \log \log \frac{Lt}{\delta} + G \log(128H) \\ &\stackrel{(b)}{\leq} 64H \log \frac{L\Lambda}{\lambda^{(1)}\delta} + 8G \log \log \frac{L\Lambda}{\lambda^{(1)}\delta} + G \log(128H) \\ &\stackrel{(c)}{=} 64H \log \left( \frac{L}{\lambda^{(1)}\delta} C \left( H \log \frac{L(G+H)}{\lambda^{(1)}\delta} + G \log \log \frac{L(G+H)}{\lambda^{(1)}\delta} \right) \right) \\ &\quad + 8G \log \log \left( \frac{L}{\lambda^{(1)}\delta} C \left( H \log \frac{L(G+H)}{\lambda^{(1)}\delta} + G \log \log \frac{L(G+H)}{\lambda^{(1)}\delta} \right) \right) + G \log(128H) \\ &\stackrel{(d)}{\leq} 128(2 + \log C) \left( H \log \frac{L(G+H)}{\lambda^{(1)}\delta} + G \log \log \frac{L(G+H)}{\lambda^{(1)}\delta} \right) \\ &\stackrel{(e)}{<} C \left( H \log \frac{L(G+H)}{\lambda^{(1)}\delta} + G \log \log \frac{L(G+H)}{\lambda^{(1)}\delta} \right), \end{aligned}$$

537 where the inequality (a) is due to Eq.(12) and Eq.(14), the inequality (b) is because  $t \leq \frac{\Lambda}{\lambda^{(1)}}$ , the  
 538 inequality (c) is by the supposition, the inequality (d) is by separately bounding the above first two  
 539 terms via Eq.(15) and Eq.(16) in the following, and the inequality (e) holds for  $C > 1200$ . This above  
 540 inequality contradicts the supposition, and, therefore, we conclude the cost complexity upper bound  
 541 proof for EXPLORE-A. Similar proof also holds for EXPLORE-B by replacing  $\tilde{m}_k^*$  with  $m_k^\dagger$ .

542 Next, we provide the upper bounds used in the inequality (d) above:

$$\begin{aligned}
& H \log \left( \frac{L}{\lambda^{(1)}\delta} C \left( H \log \frac{L(G+H)}{\lambda^{(1)}\delta} + G \log \log \frac{L(G+H)}{\lambda^{(1)}\delta} \right) \right) \\
& \leq H \log \left( \frac{L}{\lambda^{(1)}\delta} C H \log \frac{L(G+H)}{\lambda^{(1)}\delta} \right) + H \log \left( \frac{L}{\lambda^{(1)}\delta} C G \log \log \frac{L(G+H)}{\lambda^{(1)}\delta} \right) \\
& \leq H \log C + H \log \left( \frac{LH}{\lambda^{(1)}\delta} \log \frac{L(G+H)}{\lambda^{(1)}\delta} \right) + H \log C + H \log \left( \frac{LG}{\lambda^{(1)}\delta} \log \log \frac{L(G+H)}{\lambda^{(1)}\delta} \right) \\
& \leq 2H \log C + 4H \log \frac{L(G+H)}{\lambda^{(1)}\delta} \\
& \leq (4 + 2 \log C) H \log \frac{L(G+H)}{\lambda^{(1)}\delta},
\end{aligned} \tag{15}$$

543 and

$$\begin{aligned}
& G \log \log \left( \frac{L}{\lambda^{(1)}\delta} C \left( H \log \frac{L(G+H)}{\lambda^{(1)}\delta} + G \log \log \frac{L(G+H)}{\lambda^{(1)}\delta} \right) \right) \\
& \leq G \log \log \left( \frac{L}{\lambda^{(1)}\delta} C H \log \frac{L(G+H)}{\lambda^{(1)}\delta} \right) + G \log \log \left( \frac{L}{\lambda^{(1)}\delta} C G \log \log \frac{L(G+H)}{\lambda^{(1)}\delta} \right) \\
& \leq G \log \log C + G \log \log \left( \frac{LH}{\lambda^{(1)}\delta} \log \frac{L(G+H)}{\lambda^{(1)}\delta} \right) \\
& \quad + G \log \log C + G \log \log \left( \frac{LG}{\lambda^{(1)}\delta} \log \log \frac{L(G+H)}{\lambda^{(1)}\delta} \right) \\
& \leq 2G \log \log C + 4G \log \log \frac{L(G+H)}{\lambda^{(1)}\delta} \\
& \leq (4 + 2 \log \log C) G \log \log \frac{L(G+H)}{\lambda^{(1)}\delta}.
\end{aligned} \tag{16}$$

544 *Proof of Lemma C.2.*

545 **Claim 1.** For any fixed  $m \neq \tilde{m}_k^*$ , if the following equation holds, then the algorithm will not pull  
546 arm  $k$  at fidelity  $m$  with high probability.

$$N_{k,t}^{(m)} > \frac{8}{\lambda^{(m)}} \left( \frac{\Delta_k^{(\tilde{m}_k^*)}}{\sqrt{\lambda^{(\tilde{m}_k^*)}}} - \frac{\Delta_k^{(m)}}{\sqrt{\lambda^{(m)}}} \right)^{-2} \log N_{k,t}.$$

$$\begin{aligned}
\mathbf{f}\text{-UCB}_{u_t,t}^{(m)}(\mu_1^{(M)}) &= \frac{1}{\sqrt{\lambda^{(m)}}} \left( \mu_1^{(M)} - \hat{\mu}_{u_t,t}^{(m)} - \zeta^{(m)} + \sqrt{\frac{2 \log N_{u_t,t}}{N_{u_t,t}^{(m)}}} \right) \\
&\stackrel{(a)}{\leq} \frac{1}{\sqrt{\lambda^{(m)}}} \left( \mu_1^{(M)} - \mu_{u_t}^{(m)} - \zeta^{(m)} + 2 \sqrt{\frac{2 \log N_{u_t,t}}{N_{u_t,t}^{(m)}}} \right) \\
&\stackrel{(b)}{\leq} \frac{1}{\sqrt{\lambda^{(m_{u_t}^*)}}} \left( \mu_1^{(M)} - \mu_{u_t}^{(m_{u_t}^*)} - \zeta^{(m_{u_t}^*)} \right) \\
&\stackrel{(c)}{\leq} \frac{1}{\sqrt{\lambda^{(\tilde{m}_k^*)}}} \left( \mu_1^{(M)} - \hat{\mu}_{u_t,t}^{(m_{u_t}^*)} - \zeta^{(m_{u_t}^*)} + \sqrt{\frac{2 \log N_{u_t,t}}{N_{u_t,t}^{(\tilde{m}_k^*)}}} \right) \\
&= \mathbf{f}\text{-UCB}_{u_t,t}^{(m_{u_t}^*)}(\mu_1^{(M)}),
\end{aligned}$$

547 where the inequalities (a) and (c) hold with a probability at least  $1 - \frac{1}{(N_{k,t})^2}$  respectively (by  
548 Hoeffding's inequality), and the inequality (b) holds due to the equation in the claim.

## 549 C.2.2 Proof for EXPLORE-B's Upper Bound

550 As EXPLORE-B of Algorithm 2 also employs the LUCB framework, it shares the first three steps of  
 551 the proof for Theorem 3.4 in Appendix C.2. Hence, in this part, we focus on the proof of the final  
 552 cost complexity upper bound.

553 **Lemma C.3.** *If the condition in Line 10 holds, then the committed fidelity  $\hat{m}_k^*$  fulfills the following*  
 554 *inequality:*

$$2 \cdot \frac{\Delta_k^{(\hat{m}_k^*)}}{\sqrt{\lambda^{(\hat{m}_k^*)}}} \geq \frac{\Delta_k^{(\tilde{m}_k^*)}}{\sqrt{\lambda^{(\tilde{m}_k^*)}}}. \quad (17)$$

555 *Proof of Lemma C.3.* Eq.(17) is proved as follows,

$$\begin{aligned} \frac{\Delta_k^{(\hat{m}_k^*)}/\sqrt{\lambda^{(\hat{m}_k^*)}}}{\Delta_k^{(\tilde{m}_k^*)}/\sqrt{\lambda^{(\tilde{m}_k^*)}}} &\leq \frac{(\hat{\mu}_*^{(M)} - (\hat{\mu}_k^{(\hat{m}_k^*)} + \zeta^{(\hat{m}_k^*))})/\sqrt{\lambda^{(\hat{m}_k^*)}} + \sqrt{\log(2KM/\delta)/\lambda^{(1)}N_{k,t}^{(m)}}}{(\hat{\mu}_*^{(M)} - (\hat{\mu}_k^{(\tilde{m}_k^*)} + \zeta^{(\tilde{m}_k^*)}))/\sqrt{\lambda^{(\tilde{m}_k^*)}} - \sqrt{\log(2KM/\delta)/\lambda^{(1)}N_{k,t}^{(m)}}} \\ &\stackrel{(a)}{\leq} \frac{(\hat{\mu}_*^{(M)} - (\hat{\mu}_k^{(\hat{m}_k^*)} + \zeta^{(\hat{m}_k^*)}))/\sqrt{\lambda^{(\hat{m}_k^*)}} + \sqrt{\log(2KM/\delta)/\lambda^{(1)}N_{k,t}^{(m)}}}{(\hat{\mu}_*^{(M)} - (\hat{\mu}_k^{(\tilde{m}_k^*)} + \zeta^{(\tilde{m}_k^*)}))/\sqrt{\lambda^{(\tilde{m}_k^*)}} - \sqrt{\log(2KM/\delta)/\lambda^{(1)}N_{k,t}^{(m)}}} \\ &\leq 1 + \frac{2\sqrt{\log(2KM/\delta)/\lambda^{(1)}N_{k,t}^{(m)}}}{(\hat{\mu}_*^{(M)} - (\hat{\mu}_k^{(\tilde{m}_k^*)} + \zeta^{(\tilde{m}_k^*)}))/\sqrt{\lambda^{(\tilde{m}_k^*)}} - \sqrt{\log(2KM/\delta)/\lambda^{(1)}N_{k,t}^{(m)}}} \\ &\stackrel{(b)}{\leq} 1 + \frac{2\sqrt{\log(2KM/\delta)/\lambda^{(1)}N_{k,t}^{(m)}}}{2\sqrt{\log(2KM/\delta)/\lambda^{(1)}N_{k,t}^{(m)}}} = 2, \end{aligned}$$

556 where inequality (a) is due to the definition of  $\hat{m}_k^*$ , and inequality (b) is due to the condition in  
 557 Line 10.  $\square$

558 We next upper bound the number of times of  $N_{k,t}^{(m)}$  that guarantees that the condition in Line 10 is  
 559 true. Let us consider the case of exploring arm  $u_t$ .

$$\begin{aligned} \max_{m \in \mathcal{M}} \frac{\hat{\Delta}_{k,t}^{(m)}}{\sqrt{\lambda^{(m)}}} &\geq \frac{\hat{\mu}_{k_*}^{(M)} - (\hat{\mu}_k^{(\tilde{m}_k^*)} + \zeta^{(\tilde{m}_k^*)})}{\sqrt{\lambda^{(\tilde{m}_k^*)}}} \\ &\stackrel{(a)}{\geq} \frac{\hat{\mu}_{k_*}^{(M)} - (\mu_k^{(\tilde{m}_k^*)} + \zeta^{(\tilde{m}_k^*)})}{\sqrt{\lambda^{(\tilde{m}_k^*)}}} - \sqrt{\frac{\log(2KM/\delta)}{\lambda^{(1)}N_{k,t}^{(m)}}} \\ &\stackrel{(b)}{\geq} \frac{\Delta_k^{(\tilde{m}_k^*)}}{\sqrt{\lambda^{(\tilde{m}_k^*)}}} - \sqrt{\frac{\log(2KM/\delta)}{\lambda^{(1)}N_{k,t}^{(m)}}}, \end{aligned}$$

560 where inequality (a) is because that  $\hat{\mu}_k^{(\tilde{m}_k^*)} \leq \mu_k^{(\tilde{m}_k^*)} + \sqrt{\frac{\log(2KM/\delta)}{N_{k,t}^{(m)}}}$  with a probability of at least  
 561  $1 - \delta/2KM$  (therefore, with the union bound over all arm-fidelity pairs, the total failure probability  
 562 of EXPLORE is upper bounded by  $\delta/2$ ), and inequality (b) is because  $\hat{\mu}_{k_*}^{(M)} - (\mu_k^{(\tilde{m}_k^*)} + \zeta^{(\tilde{m}_k^*)}) \geq$   
 563  $\mu_{k_*}^{(M)} - (\mu_k^{(\tilde{m}_k^*)} + \zeta^{(\tilde{m}_k^*)}) = \Delta_k^{(\tilde{m}_k^*)}$ .

564 To make the condition in Line 10 hold, with the above inequality, we need

$$\frac{\Delta_k^{(\tilde{m}_k^*)}}{\sqrt{\lambda^{(\tilde{m}_k^*)}}} - \sqrt{\frac{\log(2KM/\delta)}{\lambda^{(1)}N_{k,t}^{(m)}}} \geq 3\sqrt{\frac{\log(2KM/\delta)}{\lambda^{(1)}N_{k,t}^{(m)}}},$$

565 which, after rearrangement, becomes

$$N_{k,t}^{(m)} > \frac{16\lambda^{(\tilde{m}_k^*)}}{(\Delta_k^{(\tilde{m}_k^*)})^2} \frac{\log(2KM/\delta)}{\lambda^{(1)}}.$$

566 It means that if the above inequality holds, than the condition in Line 10 must hold. That is, except  
 567 for the committed fidelity  $\hat{m}_k^*$ , we have

$$N_{k,t}^{(m)} \leq \frac{16\lambda^{(\tilde{m}_k^*)} \log(2KM/\delta)}{(\Delta_k^{(\tilde{m}_k^*)})^2 \lambda^{(1)}}, \text{ for any other fidelities } m \neq \hat{m}_k^*.$$

568 For another thing, Eq.(12) of LUCB's proof guarantees that for the selected fidelity  $\hat{m}_k^*$ , the number  
 569 of pulling times is upper bounded as follows,

$$N_{k,t}^{(\hat{m}_k^*)} \leq \frac{64}{(\Delta_k^{(\hat{m}_k^*)})^2} \log\left(\frac{Lt}{\delta}\right).$$

570 Then, we upper bound the total budget of the algorithm as follows,

$$\begin{aligned} \Lambda &= \sum_{k \in \mathcal{K}} \sum_{m \in \mathcal{M}} \lambda^{(m)} N_{k,t}^{(m)} \\ &\leq \sum_{k \in \mathcal{K}} \frac{64\lambda^{(\hat{m}_k^*)}}{(\Delta_k^{(\hat{m}_k^*)})^2} \log\left(\frac{Lt}{\delta}\right) + \sum_{k \in \mathcal{K}} \sum_{m \neq \hat{m}_k^*} \frac{16\lambda^{(m)} \lambda^{(\tilde{m}_k^*)}}{(\Delta_k^{(\tilde{m}_k^*)})^2 \lambda^{(1)}} \log\left(\frac{2KM}{\delta}\right) \\ &\stackrel{(a)}{\leq} \sum_{k \in \mathcal{K}} \frac{256\lambda^{(\tilde{m}_k^*)}}{(\Delta_k^{(\tilde{m}_k^*)})^2} \log\left(\frac{Lt}{\delta}\right) + \sum_{k \in \mathcal{K}} \sum_{m \neq \hat{m}_k^*} \frac{16\lambda^{(m)} \lambda^{(\tilde{m}_k^*)}}{(\Delta_k^{(\tilde{m}_k^*)})^2 \lambda^{(1)}} \log\left(\frac{2KM}{\delta}\right) \\ &\leq \left( \sum_{k \in \mathcal{K}} \frac{256\lambda^{(\tilde{m}_k^*)}}{(\Delta_k^{(\tilde{m}_k^*)})^2} + \sum_{k \in \mathcal{K}} \sum_{m \neq \hat{m}_k^*} \frac{16\lambda^{(m)} \lambda^{(\tilde{m}_k^*)}}{(\Delta_k^{(\tilde{m}_k^*)})^2 \lambda^{(1)}} \right) \log\left(\frac{Lt}{\delta}\right) \\ &\leq \sum_{m \in \mathcal{M}} \frac{\lambda^{(m)}}{\lambda^{(1)}} \cdot \sum_{k \in \mathcal{K}} \frac{256\lambda^{(\tilde{m}_k^*)}}{(\Delta_k^{(\tilde{m}_k^*)})^2} \log\left(\frac{Lt}{\delta}\right) \\ &\leq \sum_{m \in \mathcal{M}} \frac{\lambda^{(m)}}{\lambda^{(1)}} \cdot \sum_{k \in \mathcal{K}} \frac{256\lambda^{(\tilde{m}_k^*)}}{(\Delta_k^{(\tilde{m}_k^*)})^2} \log\left(\frac{L\Lambda}{\delta\lambda^{(1)}}\right) \\ &\stackrel{(b)}{\leq} \sum_{m \in \mathcal{M}} \frac{\lambda^{(m)}}{\lambda^{(1)}} \cdot \sum_{k \in \mathcal{K}} \frac{1024\lambda^{(\tilde{m}_k^*)}}{(\Delta_k^{(\tilde{m}_k^*)})^2} \log\left(\sum_{m \in \mathcal{M}} \frac{\lambda^{(m)}}{\lambda^{(1)}} \cdot \sum_{k \in \mathcal{K}} \frac{256\lambda^{(\tilde{m}_k^*)}}{(\Delta_k^{(\tilde{m}_k^*)})^2} \frac{L}{\lambda^{(1)}\delta}\right) \\ &\leq O\left(\sum_{m \in \mathcal{M}} \frac{\lambda^{(m)}}{\lambda^{(1)}} \cdot \tilde{H} \log\left(\sum_{m \in \mathcal{M}} \frac{\lambda^{(m)}}{\lambda^{(1)}} \cdot \tilde{H} \cdot \frac{L}{\lambda^{(1)}\delta}\right)\right), \end{aligned}$$

571 where inequality (a) is due to Eq.(17), inequality (b) is due to that  $\Lambda \leq A \log(B\Lambda) \implies \Lambda \leq$   
 572  $4A \log(AB\Lambda)$ .

### 573 C.2.3 Proof for EXPLORE-C's Upper Bound in Theorem B.1

574 **Step 4 for EXPLORE-C: Prove that if the events of Steps 2 and 3 do not happen, for  $\Lambda >$**   
 575  **$O\left(Q \log\left(\frac{KM\sqrt{Q}}{\delta(\lambda^{(1)})^2}\right)\right)$ , the algorithm terminates with a probability at least  $O(1-\delta/\Lambda^2)$ . Denote**  
 576  **$\bar{T} := \lceil \frac{\Lambda}{2\lambda^{(M)}} \rceil$  and two events  $E_1, E_2$  as follows,**

$$\begin{aligned} E_1 &:= \{\exists t \geq \bar{T} : \text{CROS}_t\}, \\ E_2 &:= \{\exists t \geq \bar{T}, k \in \mathcal{K} : (n_{k,t}^{(m_k^*)} > 16n_{k,t}^*) \cup (k \in \text{Mid}_t)\}. \end{aligned}$$



577 We first upper bound the number of rounds after  $\bar{T}$  as follows,

$$\begin{aligned}
\sum_{t \geq \bar{T}} \lambda^{(m_t)} \mathbb{1}\{\neg \text{TERM}_t\} &\stackrel{(a)}{=} \sum_{t \geq \bar{T}} \lambda^{(m_t)} \mathbb{1}\{\neg \text{TERM}_t \cap \neg \text{CROS}_t\} \\
&\stackrel{(b)}{\leq} \sum_{t \geq \bar{T}} \lambda^{(m_t)} \mathbb{1}\{(\ell_t \in \text{Mid}_t) \cup (u_t \in \text{Mid}_t)\} \\
&\leq \sum_{t \geq \bar{T}} \sum_{k \in \mathcal{K}} \lambda^{(m_t)} \mathbb{1}\{((k = \ell_t) \cup (k = u_t)) \cap (k \in \text{Mid}_t)\} \\
&\stackrel{(c)}{\leq} \sum_{t \geq \bar{T}} \sum_{k \in \mathcal{K}} \lambda^{(m_t)} \mathbb{1}\{((k = \ell_t) \cup (k = u_t)) \cap (n_{k,t}^{(m_k^*)} \leq 16n_{k,t}^*)\} \\
&= \sum_{k \in \mathcal{K}} \sum_{t \geq \bar{T}} \lambda^{(m_t)} \mathbb{1}\{((k = \ell_t) \cup (k = u_t)) \cap (n_{k,t}^{(m_k^*)} \leq 16n_{k,t}^*)\} \\
&\leq \sum_{k \in \mathcal{K}} \left( \sum_{\ell=1}^{m_k^*-1} \frac{\lambda^{(\ell)} \log(Lt^4/\delta)}{(\zeta^{(\ell)})^2} + 16\lambda^{(m_k^*)} n_{k,t}^* \right) \\
&\leq \sum_{k \in \mathcal{K}} \left( \sum_{\ell=1}^{m_k^*-1} \frac{\lambda^{(\ell)}}{(\zeta^{(\ell)})^2} + \frac{16\lambda^{(m_k^*)}}{\Delta_k^2} \right) \log\left(\frac{LT^4}{\delta}\right) \\
&\leq 4 \sum_{k \in \mathcal{K}} \left( \sum_{\ell=1}^{m_k^*-1} \frac{\lambda^{(\ell)}}{(\zeta^{(\ell)})^2} + \frac{16\lambda^{(m_k^*)}}{\Delta_k^2} \right) \log\left(\frac{LT}{\delta}\right) \\
&\leq 4 \sum_{k \in \mathcal{K}} \left( \sum_{\ell=1}^{m_k^*-1} \frac{\lambda^{(\ell)}}{(\zeta^{(\ell)})^2} + \frac{16\lambda^{(m_k^*)}}{\Delta_k^2} \right) \log\left(\frac{L\Lambda}{\lambda^{(1)}\delta}\right)
\end{aligned} \tag{18}$$

578 where the equation (a) is due to  $\neg E_1$ , the inequality (b) is due to Step 1, and the inequality (c) is due  
579 to  $\neg E_2$ .

580 Also notice that

$$\Lambda = \sum_{t < \bar{T}} \lambda^{(m_t)} + \sum_{t \geq \bar{T}} \lambda^{(m_t)} \mathbb{1}\{\neg \text{TERM}_t\} \leq \frac{\Lambda}{2} + \sum_{t \geq \bar{T}} \lambda^{(m_t)} \mathbb{1}\{\neg \text{TERM}_t\},$$

581 and, combining with Eq.(18), we have,

$$\Lambda \leq 8 \sum_{k \in \mathcal{K}} \left( \sum_{\ell=1}^{m_k^*-1} \frac{\lambda^{(\ell)}}{(\zeta^{(\ell)})^2} + \frac{16\lambda^{(m_k^*)}}{\Delta_k^2} \right) \log\left(\frac{L\Lambda}{\lambda^{(1)}\delta}\right).$$

582 Solving the above inequality concludes the cost complexity upper bound for EXPLORE-C.

583 In the end of Step 4, we show that the LUCB algorithm fulfills the fixed confidence requirement.  
584 The probability that the algorithm does not terminate after spending  $\Lambda$  budget is upper bounded by  
585  $\mathbb{P}(E_1 \cup E_2)$ . Based on Steps 2 and 3, it can be upper bounded as follows,

$$\begin{aligned}
\mathbb{P}(E_1 \cup E_2) &\leq \sum_{t > \bar{T}} \left( \frac{KM\delta}{Lt^3} + \frac{16\delta \sum_{k \in \mathcal{K}} \Delta_k^{-2}}{Lt^4} \right) \leq \Lambda \left( \frac{1}{\lambda^{(1)}} - \frac{1}{2\lambda^{(M)}} \right) \left( \frac{\delta}{(\Lambda/\lambda^{(1)})^3} \right) \sum_{k \in \mathcal{K}} \Delta_k^{-2} \\
&\leq \frac{\delta}{\Lambda^2} \sum_{k \in \mathcal{K}} \Delta_k^{-2} \left( (\lambda^{(1)})^2 - \frac{(\lambda^{(1)})^3}{2\lambda^{(M)}} \right) \\
&\leq \delta.
\end{aligned}$$

586

□

## D Detailed Theorems for Regret Minimization Case

We first present both the problem-independent (worst-case) and problem-dependent regret lower bounds in Section D.1 and then devise an elimination algorithm whose worst-case upper bounds match the worst-case lower bound up to some logarithmic factors and whose problem-dependent upper bound matches the problem-dependent lower bound in a class of MF-MAB in Section D.2.

### D.1 Regret Lower Bound

We present the problem-independent regret lower bound in Theorem D.1 and the problem-dependent regret lower bound in Theorem D.2. Both proofs are deferred to Appendix E.1 and E.2 respectively.

**Theorem D.1** (Problem-independent regret lower bound). *Given budget  $\Lambda$ , the regret of MF-MAB is lower bounded as follows,*

$$\inf_{\text{Algo}} \sup_{\mathcal{I}} \mathbb{E}[R(\Lambda)] \geq \Omega\left(K^{1/3} \Lambda^{2/3}\right),$$

where the inf is over any algorithms, the sup is over any possible MF-MAB instances  $\mathcal{I}$ .

**Theorem D.2** (Problem-dependent lower bound). *For any consistent policy that, after spending  $\Lambda$  budgets, fulfills that for any suboptimal arm  $k$  (with  $\Delta_k^{(M)} > 0$ ) and any  $a > 0$ ,  $\mathbb{E}[N_k^{(\forall m)}(\Lambda)] = o(\Lambda^a)$ , its regret is lower bounded by the following inequality,*

$$\liminf_{\Lambda \rightarrow \infty} \frac{\mathbb{E}[R(\Lambda)]}{\log(\Lambda)} \geq \sum_{k \in \mathcal{K}} \min_{m: \Delta_k^{(m)} > 0} \left( \frac{\lambda^{(m)}}{\lambda^{(1)}} \mu_1^{(M)} - \mu_k^{(M)} \right) \frac{C}{(\Delta_k^{(m)})^2}.$$

The above two lower bound proofs utilize two different regret decomposition as follows,

$$\begin{aligned} R(\Lambda) &\stackrel{(a)}{\geq} \sum_{t=1}^N \left( \frac{\lambda^{(m_t)} - \lambda^{(1)}}{\lambda^{(1)}} \mu_1 + \Delta_{I_t}^{(M)} \right) \\ &= \sum_{m=2}^M N_{\forall k}^{(m)}(\Lambda) \frac{\lambda^{(m)} - \lambda^{(1)}}{\lambda^{(1)}} \mu_1 + \sum_{k \neq k_1^{(M)}} N_k^{(\forall m)}(\Lambda) \Delta_k^{(M)}; \end{aligned} \quad (19)$$

$$R(\Lambda) = \sum_{k \in \mathcal{K}} \sum_{m=1}^M N_k^{(m)}(\Lambda) \left( \frac{\lambda^{(m)}}{\lambda^{(1)}} \mu_1^{(M)} - \mu_k^{(M)} \right), \quad (20)$$

where the inequality (a) is due to  $\Lambda > \sum_{t=1}^N \lambda^{(m_t)}$ , the  $N_k^{(m)}(\Lambda)$  is the number of times that arm  $k$  is pulled in fidelity  $m$  after paying budget  $\Lambda$ . The  $N$  with subscript  $\forall k$  and superscript  $(\forall m)$  mean the pulling times of all arms and all fidelities respectively. Due to the multi-fidelity feedback, both decompositions are different from classic bandits' regret decomposition [24, Lemma 4.5], and, therefore, we need to non-trivially extend the known approaches to our scenario.

To prove the problem-independent lower bound  $\Omega(K^{1/3} \Lambda^{2/3})$  in Theorem D.1, we utilize the decomposition in Eq.(19): In the RHS, the first term increases whether one choose fidelity other than the lowest; this is a novel term. The second term of RHS corresponds to the cost of pulling suboptimal arms which also appears in the classic MAB. With this observation, one can construct instance pairs such that it is unavoidable to do exploration at higher fidelities and, therefore, the first term is not negligible. Lastly, one needs to balance the magnitude of the above two terms case-by-case, which together bounds the regret as  $\Omega(\Lambda^{2/3})$ . To prove the problem-dependent lower bound in Theorem E.1, we utilize Eq.(20) to decompose the regret to each arm and bound each of them separately.

### D.2 An Elimination Algorithm and Its Regret Upper Bound

In this section, we propose an elimination algorithm for MF-MAB based on Auer and Ortner [1]. This algorithm proceeds in phases  $p = 0, 1, \dots$  and maintains a candidate arm set  $\mathcal{C}_p$ . The set  $\mathcal{C}_p$  is initialized as the full arm set  $\mathcal{K}$  and the algorithm gradually eliminates arms from the set until there is

only one arm remaining. When the candidate arm set contains more than one arms, the algorithm explores arms with the highest fidelity  $M$ , and when the set  $|\mathcal{C}_p| = 1$ , the algorithm exploits the singleton in the set with the lowest fidelity  $m = 1$ . We present the detail in Algorithm 4.

---

**Algorithm 4** Elimination for MF-MAB

---

1: **Input:** full arm set  $\mathcal{K}$ , budget  $\Lambda$ , and parameter  $\varepsilon$   
2: **Initialization:** phase  $p \leftarrow 0$ , candidate set  $\mathcal{C}_p \leftarrow \mathcal{K}$   
3: **while**  $p < \log_2 \frac{2}{\varepsilon}$  and  $|\mathcal{C}_p| > 1$  **do**  
4:   pull each arm  $k \in \mathcal{C}_p$  in highest fidelity  $M$  such that  $T_k^{(M)} = \lceil 2^{2p} \log \frac{\Lambda}{2^{2p} \lambda^{(M)}} \rceil$   
5:   Update reward means  $\hat{\mu}_{k,p}^{(M)}$  for all arms  $k \in \mathcal{C}_p$   
6:    $\mathcal{C}_{p+1} \leftarrow \{k \in \mathcal{C}_p : \hat{\mu}_{k,p}^{(M)} + 2^{-p+1} > \max_{k' \in \mathcal{C}_p} \hat{\mu}_{k',p}^{(M)}\}$  ▷ Elimination  
7:    $p \leftarrow p + 1$   
8: Pull the remaining arms of  $\mathcal{C}_p$  in turn in fidelity  $m = 1$  until the budget runs up

---

### D.2.1 Analysis Results

We first present the problem-dependent regret upper bound of Algorithm 4 in Theorem D.3. Its full proof is deferred to Appendix E.3.

**Theorem D.3** (Problem-Dependent Regret Upper Bound). *For any  $\varepsilon > 0$ . Algorithm 4's regret is upper bounded as follows,*

$$\begin{aligned} \mathbb{E}[R(\Lambda)] &\leq \max_{k: \Delta_k^{(M)} \leq \varepsilon} \frac{\Lambda}{\lambda^{(1)}} \Delta_k^{(M)} \\ &+ \sum_{k: \Delta_k^{(M)} > \varepsilon} \left( \left( \frac{\lambda^{(M)}}{\lambda^{(1)}} \mu_1^{(M)} - \mu_k^{(M)} \right) \left( \frac{16}{(\Delta_k^{(M)})^2} \log \frac{\Lambda (\Delta_k^{(M)})^2}{16 \lambda^{(M)}} + \frac{48}{(\Delta_k^{(M)})^2} + 1 \right) + \frac{64}{\Delta_k^{(M)}} \right) \\ &+ \sum_{k: \Delta_k^{(M)} \leq \varepsilon} \left( \left( \frac{\lambda^{(M)}}{\lambda^{(1)}} \mu_1^{(M)} - \mu_k^{(M)} \right) \left( \frac{16}{\varepsilon^2} \log \left( \frac{\Lambda \varepsilon^2}{16 \lambda^{(M)}} \right) + \frac{32}{3 \varepsilon^2} + 1 \right) + \frac{64}{\varepsilon} \right) \end{aligned} \quad (21)$$

*Epecially, if letting  $\varepsilon$  go to zero and budget  $\Lambda$  go to infinity, the above upper bound becomes*

$$\limsup_{\Lambda \rightarrow \infty} \frac{\mathbb{E}[R(\Lambda)]}{\log(\Lambda)} \leq \sum_{k \in \mathcal{K}} \left( \frac{\lambda^{(M)}}{\lambda^{(1)}} \mu_1^{(M)} - \mu_k^{(M)} \right) \frac{16}{(\Delta_k^{(M)})^2}. \quad (22)$$

Letting  $\varepsilon = (K \log \Lambda / \Lambda)^{1/3}$  in Eq.(21) of Theorem D.3, one can obtain a problem-independent regret upper bound of Algorithm 4 in Theorem D.4 as follows.

**Theorem D.4** (Regret Upper Bound for Algorithm 4). *Letting  $\varepsilon = (K \log \Lambda / \Lambda)^{1/3}$ , Algorithm 4's regret is upper bounded as follows,*

$$\mathbb{E}[R(\Lambda)] \leq O \left( K^{1/3} \Lambda^{2/3} (\log \Lambda)^{1/3} \right).$$

## E Proofs for Regret Minimization Results

### E.1 Proof of Theorem D.1

**Step 1. Construct instances and upper bound KL-divergence** Fix a policy  $\pi$ . We construct two MF-MAB instances, each with  $K$  arms and  $M$  fidelities. For the pulling costs of different fidelities, we set  $\lambda^{(M)} \leq 2\lambda^{(1)}$ . For reward feedback, we assume all arms' reward distributions at any fidelity are Bernoulli, and denote  $\mu_k^{(m)}(1), \mu_k^{(m)}(2)$  as the reward means of these two instances. Let  $\mathbb{P}_1 = \mathbb{P}_{\mu^{(1)}, \pi}$ ,  $\mathbb{E}_1 = \mathbb{E}_{\mu^{(1)}, \pi}$  and  $\mathbb{P}_2 = \mathbb{P}_{\mu^{(2)}, \pi}$ ,  $\mathbb{E}_2 = \mathbb{E}_{\mu^{(2)}, \pi}$  be the probability measures and expectations on the canonical MF-MAB model induced by  $\Lambda$ -budget interconnection of  $\pi$  and  $\mu_1$  (and  $\mu_2$ ). Denote  $k' = \arg \min_{k \in \mathcal{K}} \mathbb{E}_1[N_k^{(m>1)}(\Lambda)]$ .

642 The only difference between both instance pair is in the arm  $k'$ 's reward mean for fidelities  $m > 1$ ,  
 643 so that instance 1's optimal arm is arm 1 and instance 2's optimal arm is arm  $k'$ . The detailed reward  
 644 means are listed as follows,

|                                            | $m = 1$                                                                | $m > 1$                                                                                                           |
|--------------------------------------------|------------------------------------------------------------------------|-------------------------------------------------------------------------------------------------------------------|
| 645 $(\mu_k^{(m)}(1))_{k \in \mathcal{K}}$ | $(\frac{1}{2} + \Delta, \frac{1}{2}, \frac{1}{2}, \dots, \frac{1}{2})$ | $(\frac{1}{2} + \Delta, \frac{1}{2}, \frac{1}{2}, \dots, \frac{1}{2})$                                            |
| $(\mu_k^{(m)}(2))_{k \in \mathcal{K}}$     |                                                                        | $(\frac{1}{2} + \Delta, \frac{1}{2}, \dots, \frac{1}{2}, \frac{1}{2} + 2\Delta, \frac{1}{2}, \dots, \frac{1}{2})$ |

646 Denote the entry  $(M_t, I_t, X_t)$  as a tuple of the pulled fidelity, pulled arm, and observed reward  
 647 random variables at time  $t$ , and  $\mathcal{H} := (M_1, I_1, X_1; M_2, I_2, X_2; \dots; M_N, I_N, X_N)$  as a sequence of  
 648 applying policy  $\pi$ . We note that  $N$  is also a random variable depending on the sequence of fidelities  
 649 in pulling arms. Next, we calculate the upper bound of the KL-divergence of the above two instances  
 650 in this sequence.

$$\begin{aligned}
 \text{KL}(\mathbb{P}_1, \mathbb{P}_2) &= \mathbb{E}_1 \left[ \log \left( \frac{d\mathbb{P}_1}{d\mathbb{P}_2} \right) \right] \\
 &= \mathbb{E}_1 \left[ \log \left( \frac{d\mathbb{P}_1}{d\mathbb{P}_2} (M_1, I_1, X_1; M_2, I_2, X_2; \dots; M_N, I_N, X_N) \right) \right] \\
 &= \mathbb{E}_1 \left[ \mathbb{E}_1 \left[ \log \left( \frac{d\mathbb{P}_1}{d\mathbb{P}_2} (M_1, I_1, X_1; M_2, I_2, X_2; \dots; M_N, I_N, X_N) \right) \middle| N \right] \right] \\
 &\stackrel{(a)}{=} \mathbb{E}_1 \left[ \mathbb{E}_1 \left[ \sum_{t=1}^N \log \left( \frac{p_1(X_t | M_t, I_t)}{p_2(X_t | M_t, I_t)} \right) \middle| N \right] \right] \\
 &= \mathbb{E}_1 \left[ \sum_{t=1}^N \mathbb{E}_1 \left[ \log \left( \frac{p_1(X_t | M_t, I_t)}{p_2(X_t | M_t, I_t)} \right) \middle| N \right] \right] \\
 &\stackrel{(b)}{=} \mathbb{E}_1 \left[ \sum_{t=1}^N \mathbb{E}_1 \left[ \text{KL} \left( P_1^{(M_t, I_t)}, P_2^{(M_t, I_t)} \right) \middle| N \right] \right] \\
 &= \sum_{(m,k) \in \mathcal{M} \times \mathcal{K}} \mathbb{E}_1 \left[ \sum_{t=1}^N \mathbb{E}_1 \left[ \mathbb{1}\{M_t = m, I_t = k\} \text{KL} \left( P_1^{(M_t, I_t)}, P_2^{(M_t, I_t)} \right) \middle| N \right] \right] \\
 &= \sum_{(m,k) \in \mathcal{M} \times \mathcal{K}} \mathbb{E}_1 \left[ \text{KL} \left( P_1^{(m,k)}, P_2^{(m,k)} \right) \sum_{t=1}^N \mathbb{E}_1 \left[ \mathbb{1}\{M_t = m, I_t = k\} \middle| N \right] \right] \\
 &= \sum_{(m,k) \in \mathcal{M} \times \mathcal{K}} \text{KL} \left( P_1^{(m,k)}, P_2^{(m,k)} \right) \mathbb{E}_1 \left[ \mathbb{E}_1 \left[ \sum_{t=1}^N \mathbb{1}\{M_t = m, I_t = k\} \middle| N \right] \right] \\
 &\stackrel{(c)}{=} \sum_{(m,k) \in \mathcal{M} \times \mathcal{K}} \text{KL} \left( P_1^{(m,k)}, P_2^{(m,k)} \right) \mathbb{E}_1 \left[ T_k^{(m)}(\Lambda) \right] \\
 &= \text{KL} \left( P_1^{(m,2)}, P_2^{(m,2)} \right) \mathbb{E}_1 \left[ T_{k'}^{(m>1)}(\Lambda) \right] \\
 &\stackrel{(d)}{\leq} \frac{1}{K} \cdot \mathbb{E}_1 \left[ T_{\forall k}^{(m>1)}(\Lambda) \right] \cdot \text{KL} \left( \mathcal{B} \left( \frac{1}{2} \right), \mathcal{B} \left( \frac{1}{2} + 2\Delta \right) \right) \\
 &\stackrel{(e)}{\leq} \mathbb{E}_1 \left[ T_{\forall k}^{(m>1)}(\Lambda) \right] \cdot \frac{9\Delta^2}{K},
 \end{aligned} \tag{23}$$

651 where the equation (a) is due to

$$\begin{aligned}
& \frac{d\mathbb{P}_1}{d(\rho \times \rho \times \lambda)^N}(m_1, k_1, x_1; m_2, k_2, x_2; \dots; m_N, k_N, x_N) \\
&= p_{\mu_1, \pi}(m_1, k_1, x_1; m_2, k_2, x_2; \dots; m_N, k_N, x_N) \\
&= \prod_{t=1}^N \pi_t(m_t, k_t | m_1, k_1, x_1; \dots; m_{t-1}, k_{t-1}, x_{t-1}) p_{\mu_1}(x_t | m_t, k_t),
\end{aligned}$$

652 the equation (b) is due to

$$\begin{aligned}
\mathbb{E}_1 \left[ \log \left( \frac{p_1(X_t | M_t, I_t)}{p_2(X_t | M_t, I_t)} \right) \middle| N \right] &= \mathbb{E}_1 \left[ \mathbb{E}_1 \left[ \log \left( \frac{p_1(X_t | M_t, I_t)}{p_2(X_t | M_t, I_t)} \right) \middle| M_t, I_t \right] \middle| N \right] \\
&= \mathbb{E}_1 \left[ \text{KL} \left( P_1^{(M_t, I_t)}, P_2^{(M_t, I_t)} \right) \middle| N \right],
\end{aligned}$$

653 the equation (c) is due to the tower property as well, the inequality (d) is because arm  $k'$  is the arm  
654 with the smallest number of pulled with fidelity  $m > 1$ , and the inequality (e) is by calculating the  
655 KL-divergent between two Bernoulli distributions.

656 **Step 2. Lower bound the regret** We first note that the regret defined in Eq.(9) for instance 1 can  
657 be decomposed as follows,

$$\begin{aligned}
\mathbb{E}_1[R(\Lambda)] &\stackrel{(a)}{\geq} \sum_{t=1}^N \left( \frac{\lambda^{(m_t)} - \lambda^{(1)}}{\lambda^{(1)}} \mu_1 + \Delta_{I_t}^{(M)} \right) \\
&= \sum_{m=2}^M T_{\forall k}^{(m)}(\Lambda) \frac{\lambda^{(m)} - \lambda^{(1)}}{\lambda^{(1)}} \mu_1 + \sum_{k \neq k_1^{(M)}} T_k^{(\forall m)}(\Lambda) \Delta_k^{(M)}
\end{aligned}$$

658 where inequality (a) is due to  $\Lambda > \sum_{t=1}^N \lambda^{(m_t)}$ , the  $T_k^{(m)}(\Lambda)$  is the number of times that arm  $k$  is  
659 pulled in fidelity  $m$  (given total budget  $\Lambda$ ).

Then, we lower bound the summation of the regrets under both instances,

$$\begin{aligned}
& \mathbb{E}_1[R(\Lambda)] + \mathbb{E}_2[R(\Lambda)] \\
&= \mathbb{E}_1 \left[ \sum_{m=2}^M T_{\forall k}^{(m)}(\Lambda) \frac{\lambda^{(m)} - \lambda^{(1)}}{\lambda^{(1)}} \mu_1 + \sum_{k \neq k_1^{(M)}} T_k^{(\forall m)}(\Lambda) \Delta_k^{(M)} \right] \\
&\quad + \mathbb{E}_2 \left[ \sum_{m=2}^M T_{\forall k}^{(m)}(\Lambda) \frac{\lambda^{(m)} - \lambda^{(1)}}{\lambda^{(1)}} \mu_1 + \sum_{k \neq k_1^{(M)}} T_k^{(\forall m)}(\Lambda) \Delta_k^{(M)} \right] \\
&\geq \mathbb{E}_1 \left[ T_{\forall k}^{(m>1)}(\Lambda) \frac{\lambda^{(2)} - \lambda^{(1)}}{\lambda^{(1)}} \mu_1 + \sum_{k \neq k_1^{(M)}} T_k^{(\forall m)}(\Lambda) \Delta_k^{(M)} \right] \\
&\quad + \mathbb{E}_2 \left[ T_{\forall k}^{(m>1)}(\Lambda) \frac{\lambda^{(2)} - \lambda^{(1)}}{\lambda^{(1)}} \mu_1 + \sum_{k \neq k_1^{(M)}} T_k^{(\forall m)}(\Lambda) \Delta_k^{(M)} \right] \\
&\stackrel{(a)}{\geq} \mathbb{E}_1 \left[ T_{\forall k}^{(m>1)}(\Lambda) \right] \frac{\lambda^{(2)} - \lambda^{(1)}}{\lambda^{(1)}} \mu_1 \\
&\quad + \Delta \min \left\{ \frac{\Lambda}{\lambda^{(M)}} - \frac{\Lambda}{2\lambda^{(1)}}, \frac{\Lambda}{2\lambda^{(1)}} \right\} \left( \mathbb{P}_1 \left( T_1^{(\forall m)} \leq \frac{\Lambda}{2\lambda^{(1)}} \right) + \mathbb{P}_2 \left( T_1^{(\forall m)} > \frac{\Lambda}{2\lambda^{(1)}} \right) \right) \\
&\stackrel{(b)}{\geq} \mathbb{E}_1 \left[ T_{\forall k}^{(m>1)}(\Lambda) \right] \frac{\lambda^{(2)} - \lambda^{(1)}}{\lambda^{(1)}} \mu_1 + \frac{\Lambda \Delta}{2} \min \left\{ \frac{1}{\lambda^{(M)}} - \frac{1}{2\lambda^{(1)}}, \frac{1}{2\lambda^{(1)}} \right\} \exp(-\text{KL}(\mathbb{P}_1, \mathbb{P}_2)) \\
&\stackrel{(c)}{\geq} \mathbb{E}_1 \left[ T_{\forall k}^{(m>1)}(\Lambda) \right] \frac{\lambda^{(2)} - \lambda^{(1)}}{\lambda^{(1)}} \mu_1 \\
&\quad + \frac{\Lambda \Delta}{2} \min \left\{ \frac{1}{\lambda^{(M)}} - \frac{1}{2\lambda^{(1)}}, \frac{1}{2\lambda^{(1)}} \right\} \exp \left( -2\Delta^2 K^{-1} \mathbb{E}_1 \left[ T_{\forall k}^{(m>1)}(\Lambda) \right] \right),
\end{aligned}$$

where inequality (a) uses the  $\lambda^{(M)} \leq 2\lambda^{(1)}$  condition, inequality (b) is by Bretagnolle-Huber inequality [24, Theorem 14.2], and inequality (c) is by Eq.(23).

**Step 3. Obtain the  $\Omega(K^{\frac{1}{3}} \Lambda^{\frac{2}{3}})$  lower bound** We show that  $\mathbb{E}_1[R(\Lambda)] + \mathbb{E}_2[R(\Lambda)] \geq \Omega(K^{\frac{1}{3}} \Lambda^{\frac{2}{3}})$  for any possible quantity of  $\mathbb{E}_1 \left[ T_{\forall k}^{(m>1)}(\Lambda) \right]$  via categorized discussion as follows,

- Case 1: If  $\mathbb{E}_1 \left[ T_{\forall k}^{(m>1)}(\Lambda) \right] = 0$ , then the last formula becomes  $C\Lambda\Delta$ . Letting  $\Delta$  be a constant (via sup), we have a  $\Omega(\Lambda)$  lower bound, which means  $\Omega(K^{\frac{1}{3}} \Lambda^{\frac{2}{3}})$  is also valid.
- Case 2: If  $\mathbb{E}_1 \left[ T_{\forall k}^{(m>1)}(\Lambda) \right] \geq K^{\frac{1}{3}} \Lambda^{\frac{2}{3}}$ , then we have the  $\Omega(K^{\frac{1}{3}} \Lambda^{\frac{2}{3}})$  lower bound from the first term.
- Case 3: If  $0 < \mathbb{E}_1 \left[ T_{\forall k}^{(m>1)}(\Lambda) \right] < K^{\frac{1}{3}} \Lambda^{\frac{2}{3}}$ , we choose  $\Delta = K^{\frac{1}{3}} \Lambda^{-\frac{1}{3}}$  and also obtain the  $\Omega(K^{\frac{1}{3}} \Lambda^{\frac{2}{3}})$  lower bound.

## E.2 Proof of Theorem D.2

In this proof, we prove that for any arm  $k \in \mathcal{K}$ , the total regret due to this arm  $k$  is lower bounded as follows,

$$\liminf_{\Lambda \rightarrow \infty} \frac{\mathbb{E}[R_k(\Lambda)]}{\log(\Lambda)} \geq \min_{m: \Delta_k^{(m)} > 0} \left( \frac{\lambda^{(m)}}{\lambda^{(1)}} \mu_1^{(M)} - \mu_k^{(M)} \right) \frac{C}{(\Delta_k^{(m)})^2}.$$

Then, noticing that  $R(\Lambda) = \sum_{k \in \mathcal{M}} R_k(\Lambda)$  concludes the proof.

675 We construct instances  $\nu$  and  $\nu'$ . We set the reward distributions  $\nu = (\nu_k^{(m)})_{(k,m) \in \mathcal{K} \times \mathcal{M}}$  as Bernoulli  
676 and the reward means fulfill  $\mu_1^{(M)} > \mu_2^{(M)} \geq \mu_3^{(M)} \geq \dots \geq \mu_K^{(M)}$ , where  $\mu_k^{(m)} = \mathbb{E}_{X \sim \nu_k^{(m)}}[X]$ . We  
677 let  $\nu_k'^{(m)}$  be the same to  $\nu_k^{(m)}$  for all  $k$  and  $m$ , except for that an arm  $\ell \neq 1$ . We set arm  $\ell$ 's reward  
678 means on fidelities  $m \in \mathcal{M}_k$  to be  $\nu_\ell'^{(m)} = \nu_1^{(M)} - \zeta^{(m)} + \epsilon$ . One can verify that the reward means  
679 of arm  $k$  under instance  $\nu'$  fulfill the condition that  $|\mu_k'^{(m)} - \mu_k'^{(M)}| \leq \zeta^{(m)}$  for any fidelity  $m$ . Notice  
680 that  $\mu_k'^{(M)} > \mu_{k_*}^{(M)}$ . Hence, under instance  $\mathcal{I}'$ , the optimal arm is  $k$ . We denote  $\mathbb{P}, \mathbb{E}$  and  $\mathbb{P}', \mathbb{E}'$  as the  
681 probability measures and expectations for instances  $\mathcal{I}$  and  $\mathcal{I}'$  respectively.

682 Next, we employ the (extended) key inequality from Garivier et al. [12] as follows,

$$\sum_{k \in \mathcal{K}} \sum_{m \in \mathcal{M}} \mathbb{E}[N_k^{(m)}(\Lambda)] \text{KL}(v_k^{(m)}, v_k'^{(m)}) \geq \text{kl}(\mathbb{E}[Z], \mathbb{E}'[Z]).$$

683 Let  $Z = \lambda^{(M)} N_\ell^{(\forall m)}(\Lambda) / \Lambda$  in the above inequality, we have

$$\begin{aligned} & \sum_{m: \Delta_\ell^{(m)} > 0} \mathbb{E}[N_k^{(m)}(\Lambda)] \text{KL}(v_\ell^{(m)}, v_\ell'^{(m)}) \\ & \geq \text{kl} \left( \frac{\mathbb{E}[N_\ell^{(\forall m)}(\Lambda)]}{\Lambda}, \frac{\mathbb{E}'[N_\ell^{(\forall m)}(\Lambda)]}{\Lambda} \right) \\ & \stackrel{(a)}{\geq} \left( 1 - \frac{\lambda^{(M)} \mathbb{E}[N_\ell^{(\forall m)}(\Lambda)]}{\Lambda} \right) \log \frac{\Lambda}{\Lambda - \lambda^{(M)} \mathbb{E}'[N_\ell^{(\forall m)}(\Lambda)]} - \log 2 \end{aligned} \quad (24)$$

684 where inequality (a) is due to that for all  $(p, q) \in [0, 1]^2$ ,  $\text{kl}(p, q) \geq (1 - p) \log(1/(1 - q)) - \log 2$ .

685 Notice that the regret attributed to any arm  $k$  can be decomposed and lower bounded as follows,

$$R_\ell(\Lambda) \geq \sum_{m=1}^M N_\ell^{(m)}(\Lambda) \left( \frac{\lambda^{(m)}}{\lambda^{(1)}} \mu_1^{(M)} - \mu_\ell^{(M)} \right),$$

686 with the constraint in Eq.(24). Since this is a linear programming, we know its solution is reached at  
687 its vertex. Therefore, we lower bound the regret as follows,

$$\begin{aligned} R_\ell(\Lambda) & \geq \min_{m: \Delta_k^{(m)} > 0} \left( \frac{\lambda^{(m)}}{\lambda^{(1)}} \mu_1^{(M)} - \mu_\ell^{(M)} \right) \frac{1}{\text{KL}(v_\ell^{(m)}, v_\ell'^{(m)})} \\ & \times \left( \left( 1 - \frac{\lambda^{(M)} \mathbb{E}[N_\ell^{(\forall m)}(\Lambda)]}{\Lambda} \right) \log \frac{\Lambda}{\Lambda - \lambda^{(M)} \mathbb{E}'[N_\ell^{(\forall m)}(\Lambda)]} - \log 2 \right), \end{aligned} \quad (25)$$

688 Notice that the policy is consistent, that is,  $\mathbb{E}[N_\ell^{(\forall m)}(\Lambda)] = o(T^a)$  and  $\mathbb{E}'[N_k^{(\forall m)}(\Lambda)] = o(\Lambda^a)$  for  
689 any  $a \in (0, 1]$  and any suboptimal arm  $k \neq \ell$ . We have  $\frac{\lambda^{(M)} \mathbb{E}[N_\ell^{(\forall m)}(\Lambda)]}{\Lambda} = o(1)$  and

$$\Lambda - \lambda^{(M)} \mathbb{E}'[N_\ell^{(\forall m)}(\Lambda)] \leq \lambda^{(M)} \sum_{k \neq \ell} \mathbb{E}'[N_k^{(\forall m)}(\Lambda)] = o(\Lambda^a).$$

690 Dividing both sides of Eq.(25) by  $\Lambda$ , and letting  $\Lambda$  go to infinity and  $a$  go to 1, we have

$$\begin{aligned} \liminf_{\Lambda \rightarrow \infty} \frac{\mathbb{E}[R_\ell(\Lambda)]}{\Lambda} & \geq \min_{m: \Delta_\ell^{(m)} > 0} \left( \frac{\lambda^{(m)}}{\lambda^{(1)}} \mu_1^{(M)} - \mu_\ell^{(M)} \right) \frac{1}{\text{KL}(v_\ell^{(m)}, v_\ell'^{(m)})} \\ & \geq \min_{m: \Delta_\ell^{(m)} > 0} \left( \frac{\lambda^{(m)}}{\lambda^{(1)}} \mu_1^{(M)} - \mu_\ell^{(M)} \right) \frac{1}{\text{KL}(v_\ell^{(m)}, v_1^{(M)} - \zeta^{(m)} + \epsilon)} \end{aligned}$$

691 To bound the optimal arm 1's sample cost, we use the same  $\nu$  as above and construct another instance  
692  $\nu''$ . The instance  $\nu''$ 's reward means are the same to  $\nu$  except for arm 1 whose reward means for  
693 fidelity  $m \in \mathcal{M}_1$  are set as  $\mu_1''^{(m)} = \mu_2^{(m)} + \zeta^{(m)} - \epsilon$ . Then, with similar procedure as the above,  
694 we obtain

$$\liminf_{\Lambda \rightarrow \infty} \frac{\mathbb{E}[R_1(\Lambda)]}{\Lambda} \geq \min_{m: \Delta_k^{(m)} > 0} \left( \frac{\lambda^{(m)}}{\lambda^{(1)}} \mu_1^{(M)} - \mu_1^{(M)} \right) \frac{1}{\text{KL}(v_1^{(m)}, v_2^{(m)} + \zeta^{(m)} - \epsilon)}$$

### 695 E.3 Proof of Theorem D.4

696 We first prove a problem dependent regret upper bound as follows and then convert this bound to the  
 697 problem independent regret upper bound presented in Theorem D.4.

698 Denote  $\Delta_k^{(M)} = \mu_1^{(M)} - \mu_k^{(M)}$ , and, especially,  $\Delta_1^{(M)} = 0$ .

699 **Theorem E.1** (Problem-Dependent Regret Upper Bound). *For any  $\varepsilon > 0$ . Algorithm 4's regret is*  
 700 *upper bounded as follows,*

$$\begin{aligned} \mathbb{E}[R(\Lambda)] \leq & \sum_{k: \Delta_k^{(M)} > \varepsilon} \left( \left( \frac{\lambda^{(M)}}{\lambda^{(1)}} \mu_1^{(M)} - \mu_k^{(M)} \right) \left( \frac{16}{(\Delta_k^{(M)})^2} \log \frac{\Lambda (\Delta_k^{(M)})^2}{16 \lambda^{(M)}} + \frac{48}{(\Delta_k^{(M)})^2} + 1 \right) + \frac{64}{\Delta_k^{(M)}} \right) \\ & + \sum_{k: \Delta_k^{(M)} \leq \varepsilon} \left( \left( \frac{\lambda^{(M)}}{\lambda^{(1)}} \mu_1^{(M)} - \mu_k^{(M)} \right) \left( \frac{16}{\varepsilon^2} \log \left( \frac{\Lambda \varepsilon^2}{16 \lambda^{(M)}} \right) + \frac{32}{3 \varepsilon^2} + 1 \right) + \frac{64}{\varepsilon} \right) + \max_{k: \Delta_k^{(M)} \leq \varepsilon} \frac{\Lambda}{\lambda^{(1)}} \Delta_k^{(M)}. \end{aligned} \quad (26)$$

701 *Proof of Theorem E.1.* By Hoeffding's inequality, we have

$$\begin{aligned} \mathbb{P} \left( \hat{\mu}_{k,p}^{(M)} > \mu_k^{(M)} + 2^{-p} \right) & \leq \exp \left( - \frac{2^{-2p}}{2 \times \frac{1}{2 \times 2^{2p} \log(\Lambda / 2^{2p} \lambda^{(M)})}} \right) = \frac{2^{2p} \lambda^{(M)}}{\Lambda} \\ \mathbb{P} \left( \hat{\mu}_{k,p}^{(M)} < \mu_k^{(M)} - 2^{-p} \right) & \leq \exp \left( - \frac{2^{-2p}}{2 \times \frac{1}{2 \times 2^{2p} \log(\Lambda / 2^{2p} \lambda^{(M)})}} \right) = \frac{2^{2p} \lambda^{(M)}}{\Lambda}. \end{aligned}$$

702 That is, the empirical mean  $\hat{\mu}_k^{(M)}$  is within the confidence interval  $(\mu_k^{(M)} - 2^{-p}, \mu_k^{(M)} + 2^{-p})$  with  
 703 high probability.

704 Choose any  $\varepsilon > \frac{\varepsilon}{\Lambda}$ . Let  $\mathcal{K}' = \{k \in \mathcal{K} | \Delta_k^{(M)} > \varepsilon\}$ . Denote  $p_k := \min\{p : 2^{-p} < \frac{\Delta_k^{(M)}}{2}\}$ . From  $p_k$ 's  
 705 definition, we have the following inequality

$$2^{p_k} < \frac{4}{\Delta_k^{(M)}} < 2^{p_k+1}. \quad (27)$$

706 We also note that the cost of pulling a suboptimal arm  $k \in \mathcal{K}'$  at highest fidelity  $M$  is upper bounded  
 707 as  $\frac{\lambda^{(M)}}{\lambda^{(1)}} \mu_1^{(M)} - \mu_k^{(M)}$ , where the factor  $\frac{\lambda^{(M)}}{\lambda^{(1)}}$  is because the budget paying to pull an arm at fidelity  
 708  $M$  can be used to the the arm at fidelity 1 for fractional times.

709 The rest of this proof consists of two steps. In the first step, we assume that all empirical means  
 710 are in their corresponding confidence intervals at each phases, and show the algorithm can *properly*  
 711 eliminate all suboptimal arms in  $\mathcal{K}'$ —the arm is eliminated in or before the phase  $p_k$ . In the second  
 712 step, we upper bound the regret if there are any empirical estimates lying outside their corresponding  
 713 confidence intervals.

714 **Step 1.** If all arms' empirical means lie in confidence intervals. That is, any suboptimal arm  $k$  is  
 715 eliminated in or before the phase  $p_k$ . Because, if  $k \in \mathcal{C}_{p_k}$ , we have

$$\begin{aligned} \hat{\mu}_k^{(M)} & \leq \mu_k^{(M)} + 2^{-p_k} = \mu_1^{(M)} - \Delta_k^{(M)} + 2^{-p_k} \\ & \stackrel{(a)}{\leq} \mu_1^{(M)} - 4 \times 2^{-p_k-1} + 2^{-p_k} = \mu_1^{(M)} - 2^{-p_k} < \hat{\mu}_1^{(M)} \leq \max_{k \in \mathcal{C}_{p_k}} \hat{\mu}_k^{(M)}, \end{aligned}$$

716 where (a) is due to Eq.(27). That is, if this arm  $k$  haven't been eliminated before phase  $p_k$ , it must be  
 717 eliminated in this phase. Therefore, the total pulling times of this arm  $k$  at highest fidelity  $M$  is upper  
 718 bounded as follows,

$$T_k^{(M)} \leq \left\lceil 2^{2p_k} \log \frac{\Lambda}{2^{2p_k} \lambda^{(M)}} \right\rceil \stackrel{(a)}{\leq} \frac{16}{(\Delta_k^{(M)})^2} \log \left( \frac{(\Delta_k^{(M)})^2 \Lambda}{16 \lambda^{(M)}} \right) + 1, \quad (28)$$

719 where (a) is due to Eq.(27).



720 We then handle the number of times of pulling arms  $k$  with  $\Delta_k^{(M)} \leq \varepsilon$  in fidelity  $M$ . Although these  
 721 arms' total pulling times, eliminated in or before phase  $p_k$ , are also upper bounded by Eq.(28), their  
 722 corresponding phases  $p_k$  is greater than  $\log_2 \frac{2}{\varepsilon}$  and, therefore, cannot be reached. So, these arms'  
 723 (including the optimal arm 1's) total pulling times in fidelity  $M$  is upper bounded by

$$\frac{16}{\varepsilon^2} \log \left( \frac{\Lambda \varepsilon^2}{16 \lambda^{(M)}} \right) + 1.$$

724 Therefore, the cost due to pulling arms at fidelity  $M$  is upper bounded as follows,

$$\sum_{k \in \mathcal{K}} \left( \frac{\lambda^{(M)}}{\lambda^{(1)}} \mu_1^{(M)} - \mu_k^{(M)} \right) \left( \frac{16}{\left( \max \{ \varepsilon, \Delta_k^{(M)} \} \right)^2} \log \left( \frac{\left( \max \{ \varepsilon, \Delta_k^{(M)} \} \right)^2 \Lambda}{16 \lambda^{(M)}} \right) + 1 \right). \quad (29)$$

725 After the elimination process, arms with  $\Delta_k^{(M)} \leq \varepsilon$  may remain in the candidate arm set  $\mathcal{C}_p$  and are  
 726 exploited in turn at fidelity  $m = 1$ . As some of them are not the optimal arm, this additional cost can  
 727 be upper bounded as follows,

$$\max_{k: \Delta_k^{(M)} \leq \varepsilon} \frac{\Lambda}{\lambda^{(1)}} \Delta_k^{(M)}. \quad (30)$$

728 **Step 2.** There are two cases that some arms are eliminated improperly: for an suboptimal arm  $k$ ,  
 729 either

- 730 2.1 The suboptimal arm  $k$  is *not* eliminated in (or before) the phase  $p_k$ , and the optimal arm 1 is  
 731 in  $\mathcal{C}_{p_k}$  in phase  $p_k$ ; or
- 732 2.2 The suboptimal arm  $k$  is eliminated in (or before) the phase  $p_k$ , and the optimal arm 1 is *not*  
 733 in  $\mathcal{C}_{p_k}$  in phase  $p_k$ .

734 Case 2.1's happening means that arm  $k$  is not eliminated in or before phase  $p_k$ , which can only  
 735 happen when the arm's empirical mean  $\hat{\mu}_k^{(M)}$  lies outside its corresponding confidence interval. This  
 736 event in or before phase  $p_k$  is with a probability no greater than  $2 \times \frac{2^{2p_k} \lambda^{(M)}}{\Lambda}$ . Since this event may  
 737 happen to any suboptimal arm  $k \in \mathcal{K}'$ , then the regret of this case is upper bounded by

$$\begin{aligned} \sum_{k \in \mathcal{K}'} \frac{2^{2p_k+1} \lambda^{(M)}}{\Lambda} \frac{\Lambda}{\lambda^{(M)}} \left( \frac{\lambda^{(M)}}{\lambda^{(1)}} \mu_1^{(M)} - \mu_k^{(M)} \right) &= \sum_{k \in \mathcal{K}'} 2^{2p_k+1} \left( \frac{\lambda^{(M)}}{\lambda^{(1)}} \mu_1^{(M)} - \mu_k^{(M)} \right) \\ &\stackrel{(a)}{\leq} \sum_{k \in \mathcal{K}'} \frac{32}{(\Delta_k^{(M)})^2} \left( \frac{\lambda^{(M)}}{\lambda^{(1)}} \mu_1^{(M)} - \mu_k^{(M)} \right), \end{aligned} \quad (31)$$

738 where (a) is due to Eq.(27).

739 If Case 2.2 happens, the optimal arm 1 is not in the candidate arm set  $\mathcal{C}_{p_k}$  in phase  $p_k$ . We denote  $p_1$   
 740 as the phase that the optimal arm 1 is eliminated, and it is at this phase that some arms' empirical  
 741 means lie outside their confidence interval so that this mis-elimination happens. The probability of  
 742 this event is upper bounded by  $2 \times \frac{2^{2p_1} \lambda^{(M)}}{\Lambda}$ . We assume that arms  $k$  with  $p_k < p_1$  are eliminated in  
 743 or before phase  $p_i$  properly; otherwise, the regret is counted in Case 2.1. Therefore, the optimal arm  
 744 1 eliminated in phase  $p_1$  should be eliminated by an arm  $k$  with  $p_k \geq p_1$ . Consequently, the maximal  
 745 per time slot regret in Case 2.2 is among arms with  $p_k \geq p_1$ . Denote  $p_\varepsilon := \min\{p | 2^{-p} < \frac{\varepsilon}{2}\}$ . We

bound the cost of Case 2.2 as follows,

$$\begin{aligned}
& \sum_{p_1=0}^{\max_{i \in \mathcal{K}'} p_i} \sum_{k>1: p_k \geq p_1} \frac{2^{2p_1+1} \lambda^{(M)}}{\Lambda} \frac{\Lambda}{\lambda^{(M)}} \cdot \max_{k'>1: p_{k'} \geq p_1} \left( \frac{\lambda^{(M)}}{\lambda^{(1)}} \mu_1^{(M)} - \mu_{k'}^{(M)} \right) \\
&= \sum_{p_1=0}^{\max_{i \in \mathcal{K}'} p_i} \sum_{k>1: p_k \geq p_1} 2^{2p_1+1} \cdot \left( \frac{\lambda^{(M)}}{\lambda^{(1)}} \mu_1^{(M)} - \mu_1^{(M)} + \max_{k'>1: p_{k'} \geq p_1} \Delta_{k'}^{(M)} \right) \\
&\stackrel{(a)}{\leq} \sum_{p_1=0}^{\max_{i \in \mathcal{K}'} p_i} \sum_{k>1: p_k \geq p_1} 2^{2p_1+1} \cdot \left( \frac{\lambda^{(M)}}{\lambda^{(1)}} \mu_1^{(M)} - \mu_1^{(M)} + 4 \times 2^{-p_1} \right) \\
&\stackrel{(b)}{\leq} \sum_{k>1} \sum_{p_1=0}^{\min\{p_k, p_\varepsilon\}} 2^{2p_1+1} \cdot \left( \frac{\lambda^{(M)}}{\lambda^{(1)}} \mu_1^{(M)} - \mu_1^{(M)} + 4 \times 2^{-p_1} \right) \\
&\leq \sum_{k>1} \left( \left( \frac{\lambda^{(M)}}{\lambda^{(1)}} \mu_1^{(M)} - \mu_1^{(M)} \right) \sum_{p_1=0}^{\min\{p_k, p_\varepsilon\}} 2^{2p_1+1} + \sum_{p_1=0}^{\min\{p_k, p_\varepsilon\}} 2^{p_1+3} \right) \\
&\leq \sum_{k>1} \left( \left( \frac{\lambda^{(M)}}{\lambda^{(1)}} \mu_1^{(M)} - \mu_1^{(M)} \right) \frac{2^{2\min\{p_k, p_\varepsilon\}+1}}{3} + 2^{\min\{p_k, p_\varepsilon\}+4} \right) \\
&\leq \sum_{k \in \mathcal{K}'} \left( \left( \frac{\lambda^{(M)}}{\lambda^{(1)}} \mu_1^{(M)} - \mu_1^{(M)} \right) \frac{2^{2p_k+1}}{3} + 2^{p_k+4} \right) + \sum_{k>1, k \notin \mathcal{K}'} \left( \left( \frac{\lambda^{(M)}}{\lambda^{(1)}} \mu_1^{(M)} - \mu_1^{(M)} \right) \frac{2^{2p_\varepsilon+1}}{3} + 2^{p_\varepsilon+4} \right) \\
&\stackrel{(c)}{\leq} \sum_{k \in \mathcal{K}'} \left( \left( \frac{\lambda^{(M)}}{\lambda^{(1)}} \mu_1^{(M)} - \mu_1^{(M)} \right) \frac{32}{3(\Delta_k^{(M)})^2} + \frac{64}{\Delta_k^{(M)}} \right) + \sum_{k>1, k \notin \mathcal{K}'} \left( \left( \frac{\lambda^{(M)}}{\lambda^{(1)}} \mu_1^{(M)} - \mu_1^{(M)} \right) \frac{32}{3\varepsilon^2} + \frac{64}{\varepsilon} \right) \\
&\leq \sum_{k \in \mathcal{K}'} \left( \left( \frac{\lambda^{(M)}}{\lambda^{(1)}} \mu_1^{(M)} - \mu_k^{(M)} \right) \frac{32}{3(\Delta_k^{(M)})^2} + \frac{64}{\Delta_k^{(M)}} \right) + \sum_{k>1, k \notin \mathcal{K}'} \left( \left( \frac{\lambda^{(M)}}{\lambda^{(1)}} \mu_1^{(M)} - \mu_k^{(M)} \right) \frac{32}{3\varepsilon^2} + \frac{64}{\varepsilon} \right) \tag{32}
\end{aligned}$$

where (a) and (c) are due to Eq.(27), and (b) is due to the property of swapping two summations.

Summing up the costs in Eq.(29), Eq.(30), Eq.(31), and Eq.(32) concludes the proof.  $\square$

Next, we derive the problem-independent regret bound from Eq.(26). When  $\Lambda$  is large, the  $O(\log \Lambda)$  and  $O(\Lambda)$  terms dominate other terms in Eq.(26). For any given  $\varepsilon$ , if  $\Lambda$  is large enough, we always have  $\varepsilon > 4\sqrt{\frac{\lambda^{(M)} e}{\Lambda}}$ , which, with some calculus, guarantees that  $\frac{16}{(\Delta_k^{(M)})^2} \log \frac{\Lambda(\Delta_k^{(M)})^2}{16\lambda^{(M)}} < \frac{16}{\varepsilon^2} \log \frac{\Lambda \varepsilon^2}{16\lambda^{(M)}}$  for all  $\Delta_k^{(M)} > \varepsilon$ . Therefore, we can scale all logarithmic arm pulling times as  $\frac{16}{\varepsilon^2} \log \frac{\Lambda \varepsilon^2}{16\lambda^{(M)}}$ , and upper bound the pulling cost  $\left( \frac{\lambda^{(M)}}{\lambda^{(1)}} \mu_1^{(M)} - \mu_k^{(M)} \right)$  by  $\frac{\lambda^{(M)}}{\lambda^{(1)}} \mu_1^{(M)}$ . We derive the problem-independent regret upper bound as follows,

$$\begin{aligned}
\mathbb{E}[R(\Lambda)] &\leq \frac{K\mu_1^{(M)} \cdot \lambda^{(M)}}{\lambda^{(1)}} \frac{16}{\varepsilon^2} \log \frac{\Lambda \varepsilon^2}{16\lambda^{(M)}} + \frac{\Lambda}{\lambda^{(1)}} \varepsilon \\
&\leq \frac{K\mu_1^{(M)} \cdot \lambda^{(M)}}{\lambda^{(1)}} \frac{16}{\varepsilon^2} \log \frac{\Lambda}{16\lambda^{(M)}} + \frac{\Lambda}{\lambda^{(1)}} \varepsilon \\
&\stackrel{(a)}{\leq} 2 \left( \frac{16K\mu_1^{(M)} \lambda^{(M)}}{\lambda^{(1)}} \log \frac{\Lambda}{16\lambda^{(M)}} \right)^{\frac{1}{3}} \left( \frac{\Lambda}{\lambda^{(1)}} \right)^{\frac{2}{3}},
\end{aligned}$$

where the equation of (a) holds when  $\varepsilon = \left( \frac{K\mu_1^{(M)} \log(\Lambda/16\lambda^{(M)})}{(\Lambda/16\lambda^{(M)})} \right)^{\frac{1}{3}}$ .
